# Supplementary material
Source: PubMed Central journal article supplement (PMC2527925)
Supplement: 0805685105_0805685105SI.pdf [file 0805685105_0805685105SI.pdf]

# Supporting Information

Motegi *et al.* 10.1073/pnas.0805685105

## SI Methods

**Cell Culture, Reagents, and Antibodies.** HEK293T, HCT116, and SW480 cells were cultured as described previously (1, 2). MEFs were cultured in DMEM supplemented with 15% FBS, 2% glutamine, 0.1 mM  $\beta$ -mercaptoethanol, 100 units/ml penicillin, and 100  $\mu$ g/ml streptomycin. U2OS/DR-GFP cells were grown in McCoy's media supplemented with 10% FBS. Antibodies used here are anti-HLTF polyclonal (Bethyl Laboratories), anti-SHPRH polyclonal (a gift from Dr. R. Sood, National Human Genome Research Institute), anti-PCNA (PC10, Santa Cruz Biotechnology), anti-ubiquitin (P4D1, Santa Cruz Biotechnology), anti- $\alpha$ -tubulin (ab21058, Abcam), anti-myc (9E10, Santa Cruz Biotechnology), anti-HA monoclonal (12CA5, Roche), and anti-FLAG monoclonal (M2, Sigma). MMS, hydroxyurea, aphidicolin, and 5-azacytidine were purchased from Sigma. Cells were treated with 5-azacytidine as described in ref. 3.

**Construction of Various Expression Plasmids.** FLAG-tagged HLTF mammalian expression plasmid has been described (2). A full-length cDNA of *HLTF* was cloned into yeast plasmids (a low-copy plasmid with a weak CYC promoter or a high-copy plasmid with a TEF promoter). Plasmids expressing SHPRH-myc-His, RAD18-myc-His, 3XFLAG-PCNA (wild-type or K164R mutant), UBC13-HA (wild-type or C87A mutant), MMS2-HA, and HR6B-HA have been described (1).

**Yeast UV Sensitivity Assay.** Wild-type or *rad5*-deficient strains transformed with plasmids expressing yeast Rad5, SHPRH, or HLTF or empty vectors were serially diluted, and the cells were spotted on 2 synthetic drop-out plates without tryptophan and with 200  $\mu$ g/ml G418 to keep plasmids. One plate was treated with UV irradiation (50 J/m<sup>2</sup>), and both plates were incubated at 30°C for 3 days before pictures were taken.

**Coimmunoprecipitation Analysis and GST Pull-Down Assays.** Coimmunoprecipitation and interaction determined by various GST fusion proteins, including GST-UBC13, GST-MMS2, GST-RAD6, and GST were performed as described in ref. 1.

**Lentiviral shRNA-Mediated Gene-Silencing.** *HLTF*- or *SHPRH*-silencing lentivirus vectors were purchased from Open Biosystems. Viruses were produced as described in ref. 1.

**MMS Sensitivity and MMS-Induced Chromosome Breakage Analysis.** *HLTF*-silenced cells were treated with various concentrations of MMS for 1 h and plated onto 6-well plates at defined cell densities. Surviving colonies were counted and the surviving fraction (%) was calculated by comparing colony numbers of untreated cells. For MMS-induced chromosome breakage assay, wild type and *Hltf*<sup>-/-</sup> MEFs were treated with 0.01% MMS for 1 h, cultured for 24 h, then chromosomes in metaphase spreads were examined as described in ref. 1.

**siRNA and Recombination Reporter Assay.** U2OS human osteocarcinoma cell lines stably transfected with a single copy of an intact DR-GFP reporter gene (gift from Dr. M. Jasin at the Memorial Sloan-Kettering Institute) were used to measure the HR frequency (4). siRNA duplexes specifically targeting *SHPRH*, *HLTF*, *RAD18*, and *MMS2* (SMARTpool) and control siRNAs were purchased from Dharmacon and transfected as the manufacturer suggested. On-target plus nontargeting siRNA was used as a control. HR frequency was determined by the number of cells expressing GFP divided by the number of cells expressing DsRed (as an indicator for transfection). Experiments were repeated at least 3 times, and the average values are reported.

**Mutation Frequency Analysis.** The Burkitt cell line, Ramos (gift from Dr. R. Harris at the University of Minnesota) was used to determine mutation frequencies as described in ref. 5.

1. Motegi A, *et al.* (2006) Human SHPRH suppresses genomic instability through proliferating cell nuclear antigen polyubiquitination. *J Cell Biol* 175:703–708.
2. Moinova HR, *et al.* (2002) *HLTF* gene silencing in human colon cancer. *Proc Natl Acad Sci USA* 99:4562–4567.
3. Veigl ML, *et al.* (1998) Biallelic inactivation of hMLH1 by epigenetic gene silencing, a novel mechanism causing human MSI cancers. *Proc Natl Acad Sci USA* 95:8698–8702.

4. Nakanishi K, *et al.* (2005) Human Fanconi anemia monoubiquitination pathway promotes homologous DNA repair. *Proc Natl Acad Sci USA* 102:1110–1115.
5. Harris RS, Sale JE, Petersen-Mahrt SK, Neuberger MS (2002) AID is essential for immunoglobulin V gene conversion in a cultured B cell line. *Curr Biol* 12:435–438.

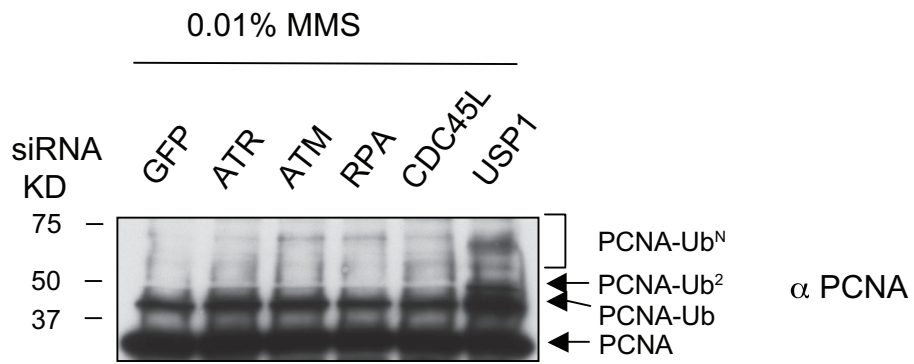

**Fig. S1.** PCNA polyubiquitination was enhanced by the knockdown of USP1, whereas it was not affected by the knockdown of *ATR*, *ATM*, *RPA*, or *CDC45L*. Ub, Ub<sup>2</sup>, and Ub<sup>N</sup> indicate mono-, di-, and polyubiquitination of PCNA, respectively.

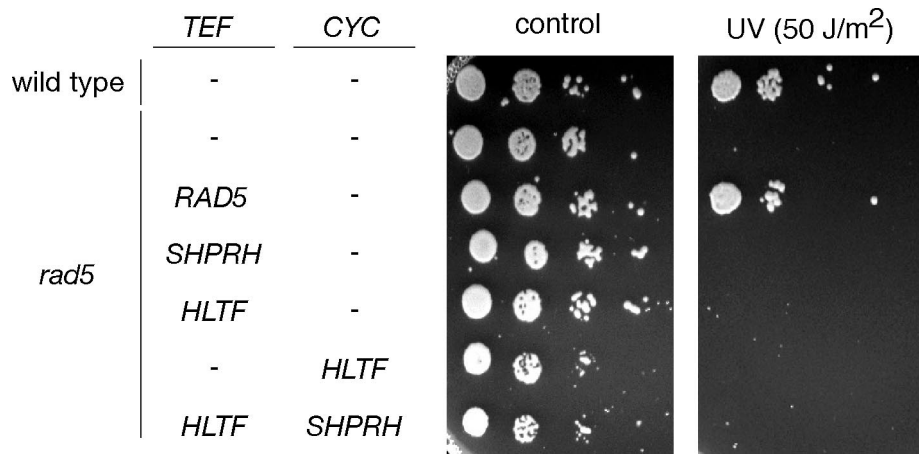

**Fig. S2.** *HLTF* and/or *SHPRH* expression does not rescue the UV sensitivity of the yeast *rad5Δ* strain. The human *HLTF*, *SHPRH*, or both were expressed under weak (*CYC*) or strong (*TEF*) promoter in the yeast *rad5Δ* strain. Yeast *RAD5* gene was expressed as a positive control.

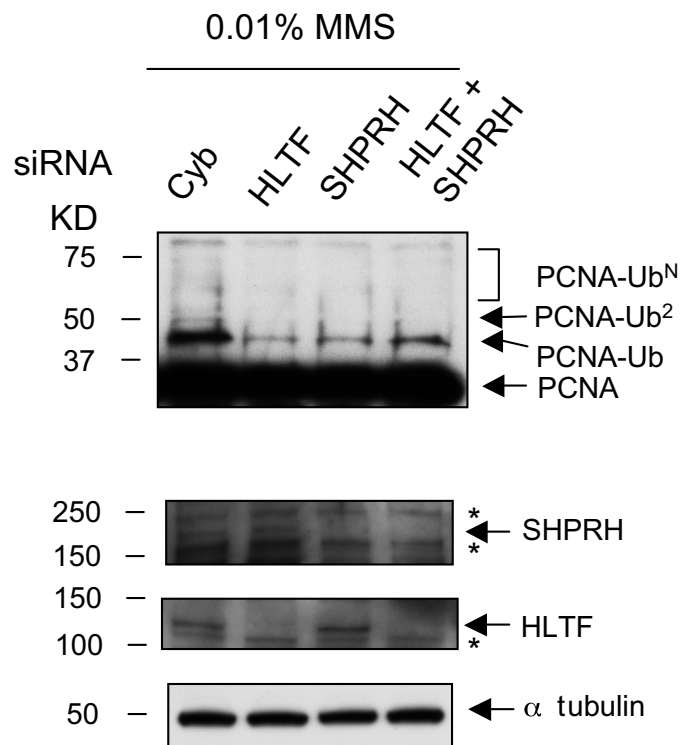

**Fig. S3.** The reduction of *HLTF* or *SHPRH* expression by siRNA-reduced PCNA polyubiquitination. Depletion of *HLTF* and *SHPRH* was achieved by siRNA in HEK293T cells. 72 h after transfection, cells were either mock treated or treated with 0.01% MMS. Cells were harvested 1.5 h later. Anti-PCNA immunoprecipitation were performed as in Fig. 1. *Cyb* is a control siRNA transfection targeting *cyclophilin B* that does not have any known function in DNA metabolism. The siRNA knockdown of *HLTF* and *SHPRH* was checked by Western blot. Asterisks indicate nonspecific bands.





**Table S1. Sequence comparisons between yeast and human ubiquitin ligases**

|        |             | HsSHPRH     | HsHLTF      |
|--------|-------------|-------------|-------------|
| ScRad5 | Full length | 17.2 (27.5) | 21.1 (34.5) |
|        | RING        | 36.4 (47.3) | 35.3 (51.0) |
|        | SWI2/SNF2   | 45.5 (62.1) | 59.8 (75.8) |

Sequence identities and similarities (in parenthesis) between budding yeast (Sc) and human (Hs) ubiquitin ligases involved in PCNA modifications were calculated by using the NeedleN program (<http://srs.ebi.ac.uk/srsbin/cgi-bin/wgetz?-page+Launch+-id+19son1NKD7a+-appl+needleN+-launchFrom+top>) and expressed in %. Comparisons of full-length, RING, or SWI2/SNF2 domains are shown.
